# Supplementary material
Source: Springer Nature journal article supplement (https://www.springermedizin.de/resource/supplementary/13013_2009_140_MOESM1_ESM.pdf/9631252)

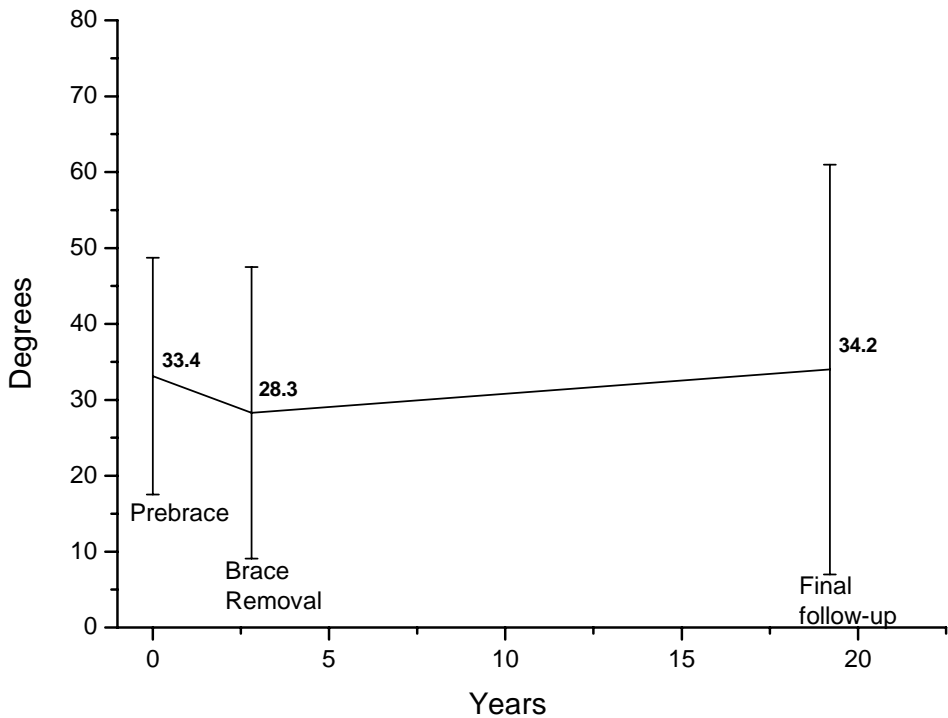

Supplement: MOESM1 [file 9631252]
